# Supplementary material for: Transcriptional profiling of human Vδ1 T cells reveals a pathogen-driven adaptive differentiation program
Source: PubMed Central journal article supplement (PMC9533230; doi:10.1016/j.celrep.2022.110858), 2022-05-24
Supplement: NIHMS1810678-supplement-1.pdf [file NIHMS1810678-supplement-1.pdf]

**Supplemental information**

**Transcriptional profiling of human V $\delta$ 1 T cells  
reveals a pathogen-driven adaptive  
differentiation program**

**Jack L. McMurray, Anouk von Borstel, Taher E. Taher, Eleni Syrimi, Graham S. Taylor, Maria Sharif, Jamie Rossjohn, Ester B.M. Remmerswaal, Frederike J. Bemelman, Felipe A. Vieira Braga, Xi Chen, Sarah A. Teichmann, Fiyaz Mohammed, Andrea A. Berry, Kirsten E. Lyke, Kim C. Williamson, Michael J.T. Stubbington, Martin S. Davey, Carrie R. Willcox, and Benjamin E. Willcox**

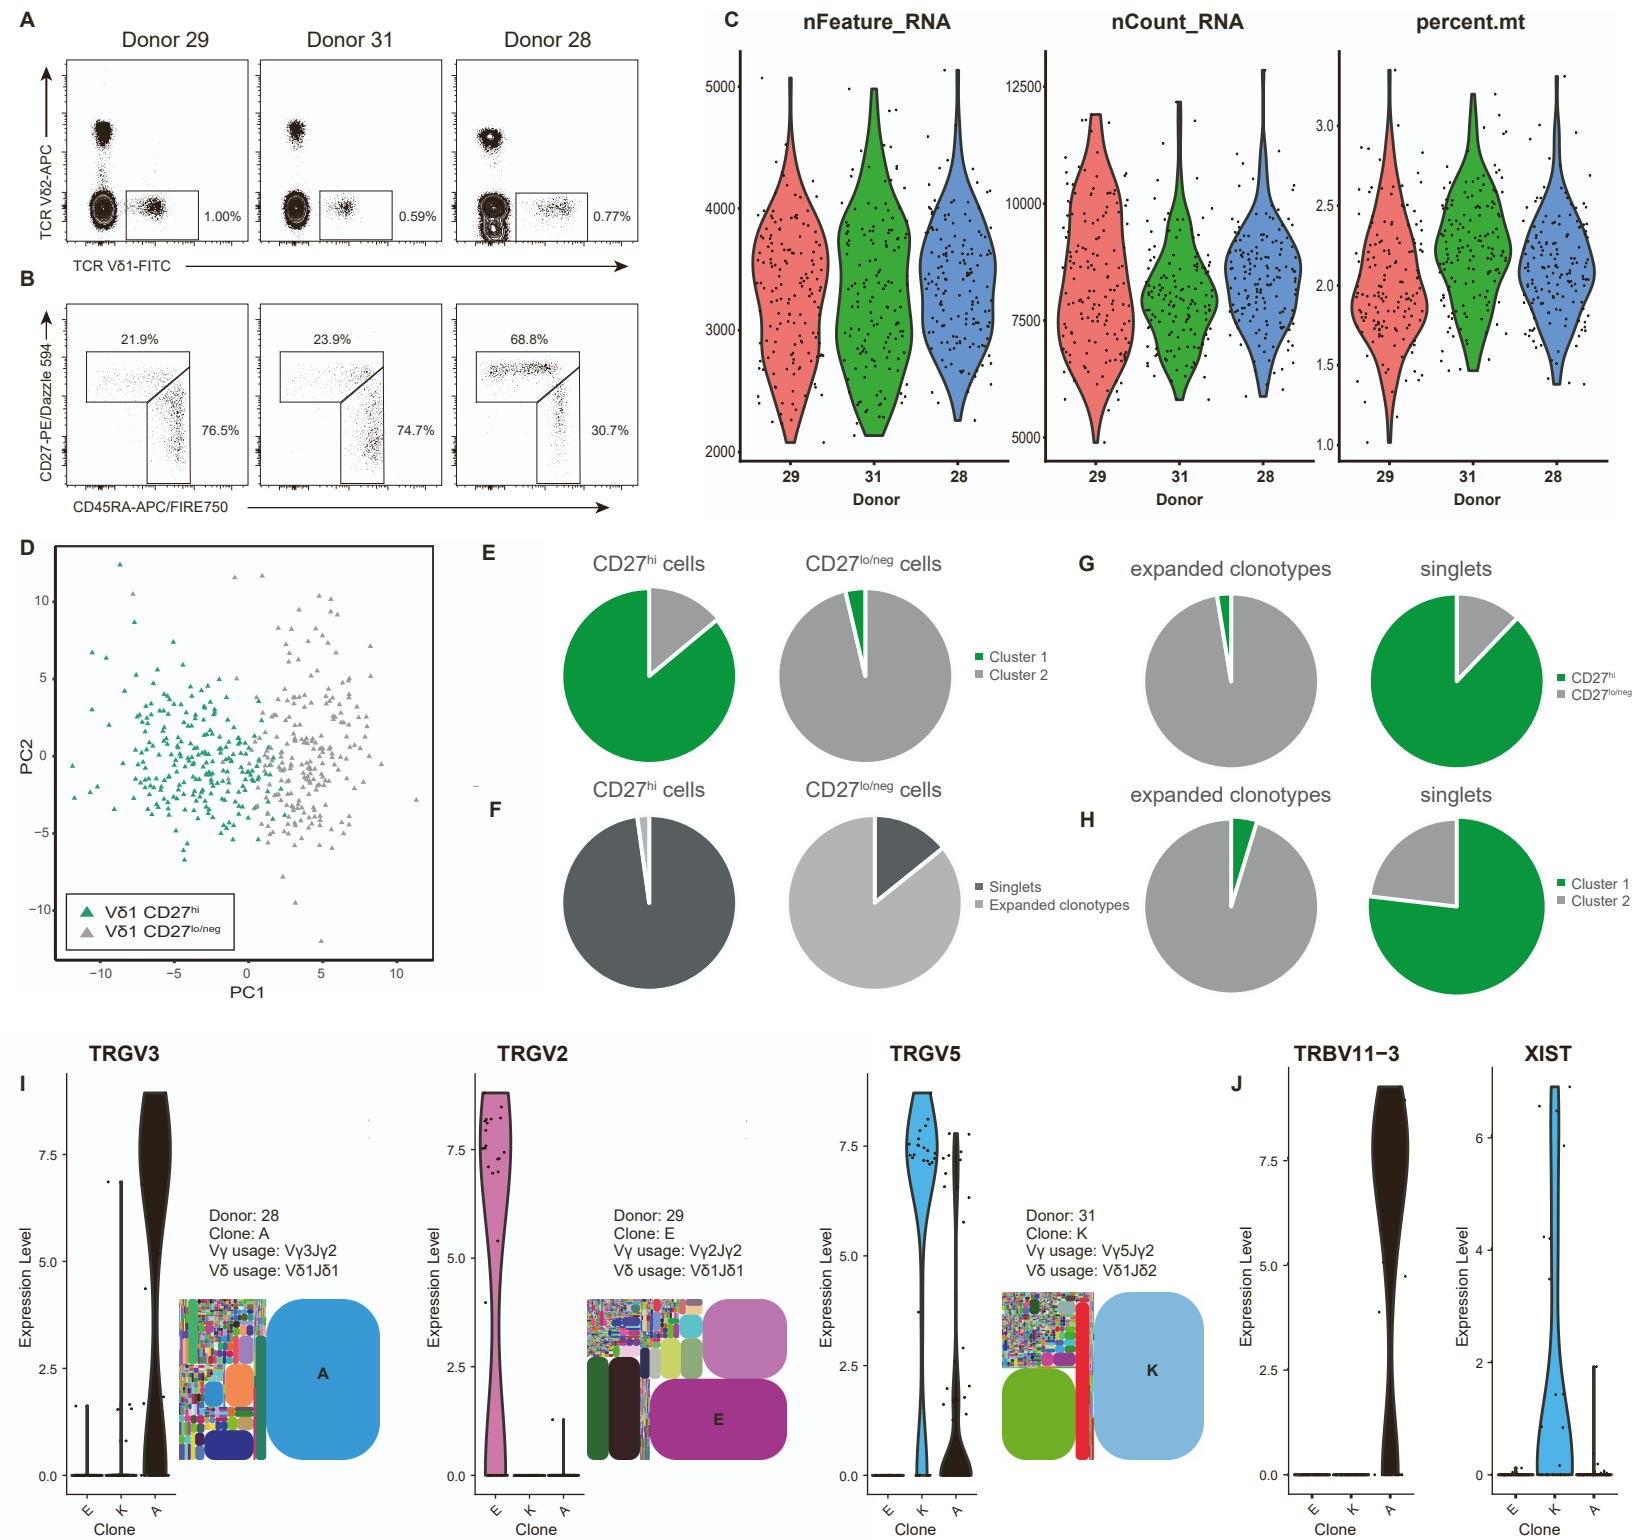

Figure S1

**Figure S1. Single cell transcriptomic analysis of peripheral blood V $\delta$ 1<sup>+</sup> T-cells. Related to Figure 1.**

(A) Percentage of V $\delta$ 1<sup>+</sup> T-cells of CD3<sup>+</sup> T-cells, and (B) Phenotype of V $\delta$ 1<sup>+</sup> T-cells sorted for single cell RNAseq from three donors. Cells were sorted as CD27<sup>hi</sup> or CD27<sup>lo/neg</sup> as indicated. (C) Number of genes found (nFeature), total number of transcripts (nCount\_RNA), and percentage mitochondrial reads (percent.mt) in V $\delta$ 1<sup>+</sup> T-cell samples from each donor. (D) Principal component analysis was performed on single cell RNA sequencing data from FACS-sorted V $\delta$ 1 cells taken from three donors. Identity from FACS-results were used to colour the cells. This displayed a 91.1% concordance with identities determined through clustering. (E) Proportion of cells sorted as CD27<sup>hi</sup> assigned to cluster 1 (197 cells; 86.0%) or cluster 2 (32 cells; 14.0%); or sorted as CD27<sup>lo/neg</sup> that were assigned to cluster 1 (8 cells; 3.7%) or cluster 2 (210 cells; 96.3%). (F) Proportion of cells sorted as CD27<sup>hi</sup> expressing singlet TCRs (found only once; 224 cells; 97.8%) or expanded clonotypes (found more than once; 5 cells; 2.2%) or sorted as CD27<sup>lo/neg</sup> expressing singlet TCRs (31 cells; 14.2%) or expanded clonotypes (187 cells; 85.8%). (G) Proportion of cells expressing expanded TCR clonotypes sorted as CD27<sup>hi</sup> (5 cells; 2.6%) or CD27<sup>lo/neg</sup> (187 cells; 97.4%); or expressing singlet TCRs sorted as CD27<sup>hi</sup> (224 cells; 87.8%) or CD27<sup>lo/neg</sup> (31 cells; 12.2%). (H) Proportion of cells expressing expanded TCR clonotypes assigned to cluster 1 (9 cells; 4.7%) or cluster 2 (183 cells; 95.3%); or singlet TCRs assigned to cluster 1 (196 cells; 76.9%) or cluster 2 (59 cells; 23.1%). (I-J) The most abundant clones from each donor displayed very few differences from one another. However, these clones did show distinct V $\gamma$  gene segment usage (I), which was validated by their prevalence in previous NGS TCR repertoire analysis of these donors (Davey et al., 2017) (J). Clone A also expressed a rearranged TCR $\beta$  gene (*TRBV11-3*). Clone K was from a female donor and expressed *XIST*, a gene associated with X chromosome inactivation.

**A**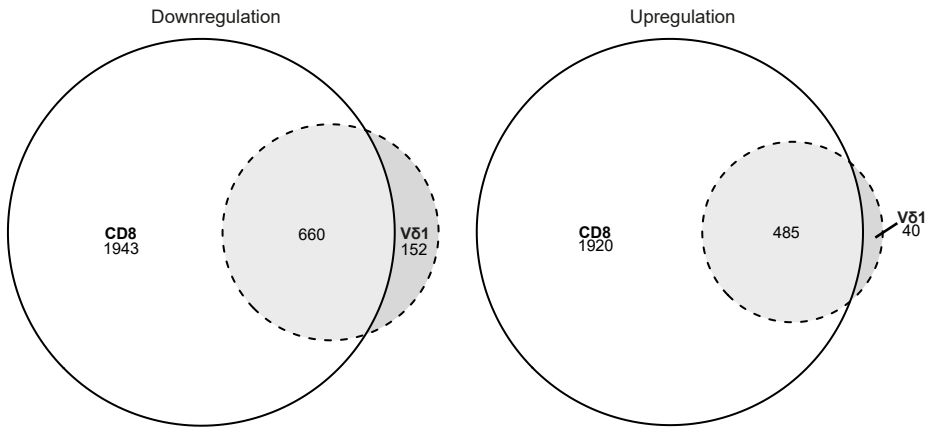**B**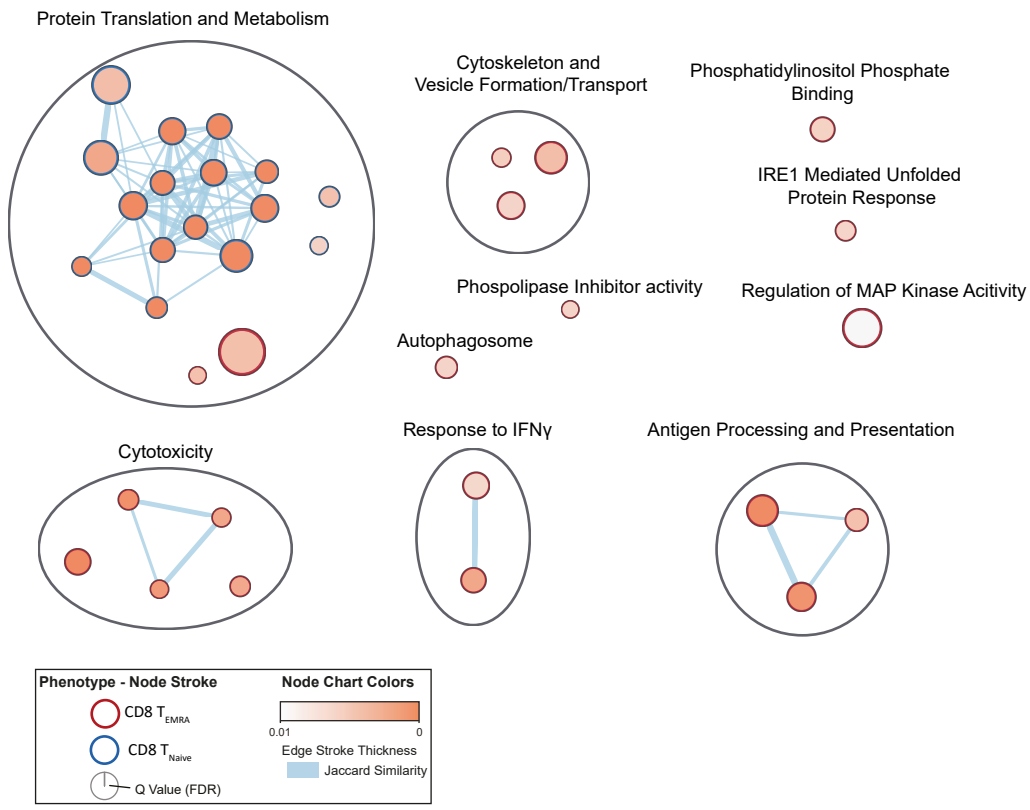**Figure S2**

**Figure S2. Bulk RNA sequencing on sorted V $\delta$ 1 populations reveals transcriptomic similarity between V $\delta$ 1 and CD8 populations. Related to Figure 2.**

(A) Differential gene expression between V $\delta$ 1 and CD8 T-cell populations revealed a number of shared differentially expressed transcripts. These were delineated into subsets of genes which downregulated in (left) or upregulated (right) upon differentiation from T<sub>naïve</sub> to T<sub>effector</sub>/T<sub>EMRA</sub> cells.

(B) Geneset enrichment analysis (GSEA) using the GO database revealed enrichment of 12 pathways associated with protein translation in the CD8 T<sub>naïve</sub> population. In contrast, pathways associated with Cytotoxicity, Cellular response to IFN $\gamma$ , and cellular metabolism were enriched in CD8 T<sub>EMRA</sub> cells. Genes differentially expressed between CD8 populations were used as input. Cytoscape was used to produce the enrichment map, where the size of the node indicates the size of the geneset, edge thickness represents Jaccard similarity scores between the gene sets, and node colour is based on FDR value. Only genesets with an FDR below 0.001 are shown.

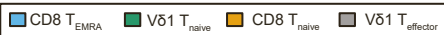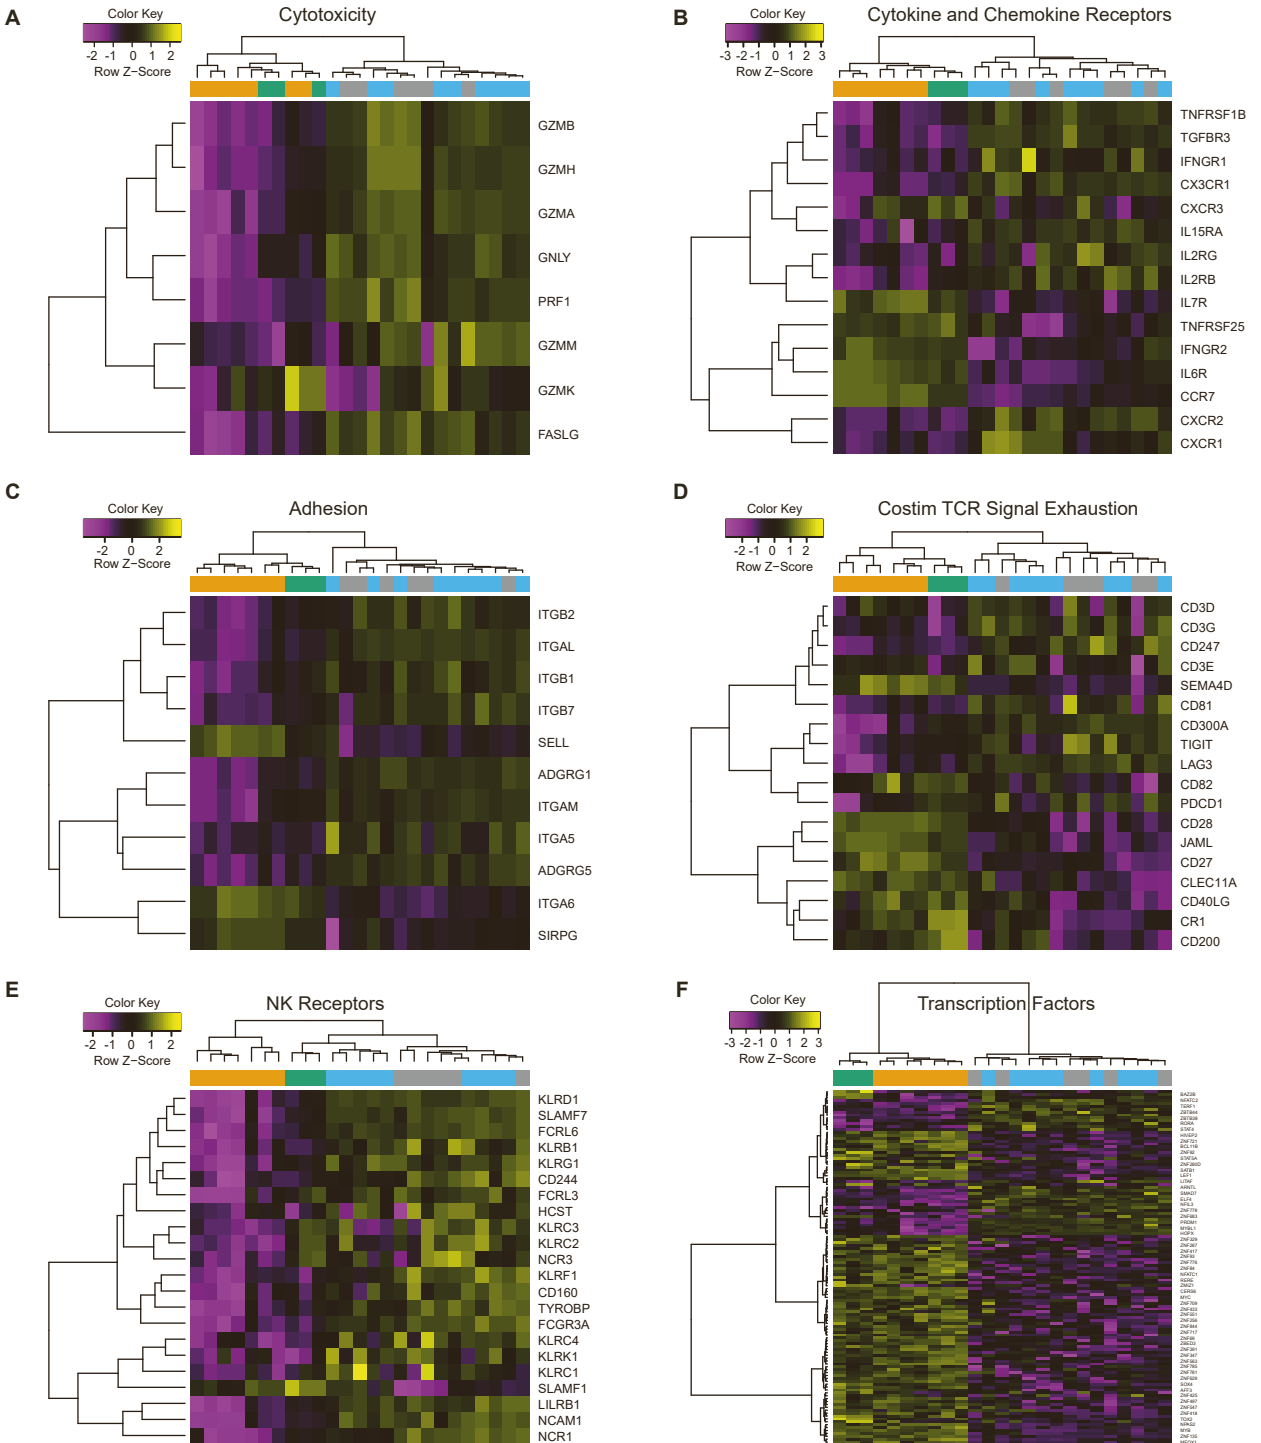

Figure S3

**Figure S3. Bespoke gene lists show close concordance between V $\delta$ 1 T<sub>effector</sub> and CD8 T<sub>EMRA</sub> cells. Related to Figure 3.**

(A-E) Heatmaps of bespoke gene lists linked to cytotoxicity, cytokine and chemokine receptors, adhesion, costimulation and TCR signalling and exhaustion, and NK receptors were created, utilising hierarchical clustering algorithms. In all instances, V $\delta$ 1 T<sub>effector</sub> clustered with CD8 T<sub>EMRA</sub>, whereas V $\delta$ 1 T<sub>naïve</sub> clustered with CD8 T<sub>naïve</sub>.

(F) 122 transcription factors differentially expressed between V $\delta$ 1 T<sub>naïve</sub> and T<sub>effector</sub> cells were plotted as a heatmap utilising hierarchical clustering.

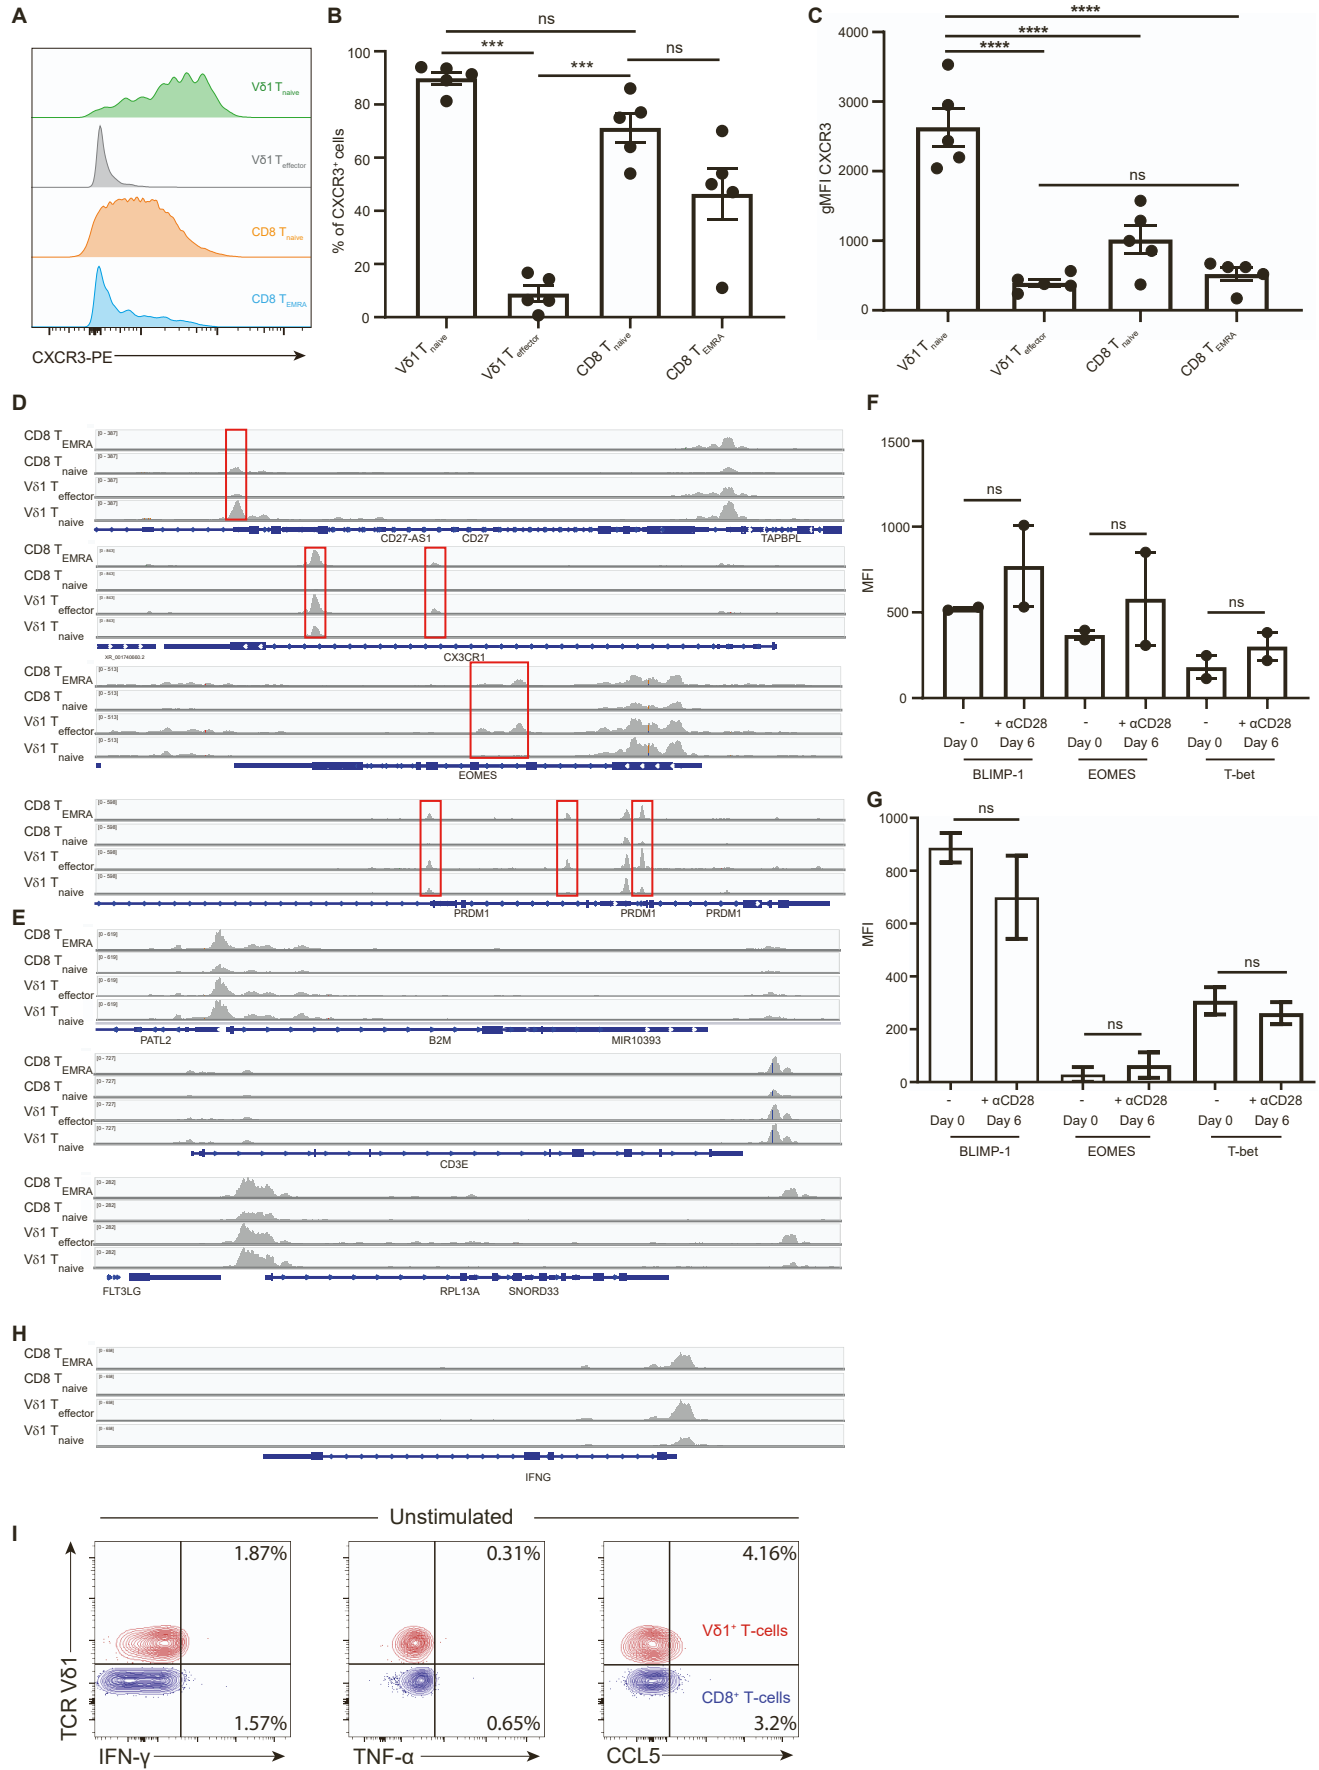

Figure S4



**Figure S4. Flow cytometry and ATAC comparison of V $\delta$ 1 and CD8 T cell subsets. Related to Figures 3 and 4.**

(A-C) Expression of CXCR3 on V $\delta$ 1 and CD8 T-cell subsets. Prevalence of V $\delta$ 1 and CD8 T-cell subsets expressing CXCR3 was determined using flow cytometry. (A) Representative histograms for flow cytometric analysis. Five donors were collated, and bar charts representing % of CXCR3 positive cells (B) and CXCR3 gMFI (C) are shown. Data were compared with one-way ANOVA with Tukey's multiple comparisons ( $P < 0.001$ ; \*\*\*).

(D) ATAC sequencing peaks from cell populations were visualised using IGV Genome viewer from a single donor. Peaks are shown for the genes: *CD27*, *CX3CR1*, *EOMES*, and *PRDM1* and highlight differences between effector and naïve populations. Differing peaks of interest between the cell populations are highlighted in the red boxes. (E) No differences between peak size were seen between the populations in terms of *CD3E* and the housekeeping genes *B2M* and *RPL13A*.

(F-G) Minimal and insignificant effects of CD28 ligation on expression of transcription factors in enriched V $\delta$ 1 T<sub>naïve</sub> (F) and CD8 T<sub>naïve</sub> (G) subsets. Flow cytometric analysis of BLIMP-1, Eomes and T-bet expression in T<sub>naïve</sub> cells on day 0 (unstimulated) and day 6 of stimulation with plate-bound anti-CD28 antibodies. The bar charts represents data from two donors. Data were analysed by one-way ANOVA with Tukey's multiple comparisons.

(H) ATAC sequencing peaks from cell populations were visualised using IGV Genome viewer from a single donor. Peaks are shown for *IFNG* and differences are seen between T<sub>effector</sub>/T<sub>EMRA</sub> and T<sub>naïve</sub> populations.

(I) Cytokine production by unstimulated V $\delta$ 1 and CD8 T-cells. Overlaid contour flow cytometry plots of gated populations of V $\delta$ 1<sup>+</sup> T-cells (top) and CD8<sup>+</sup> T-cells (bottom).

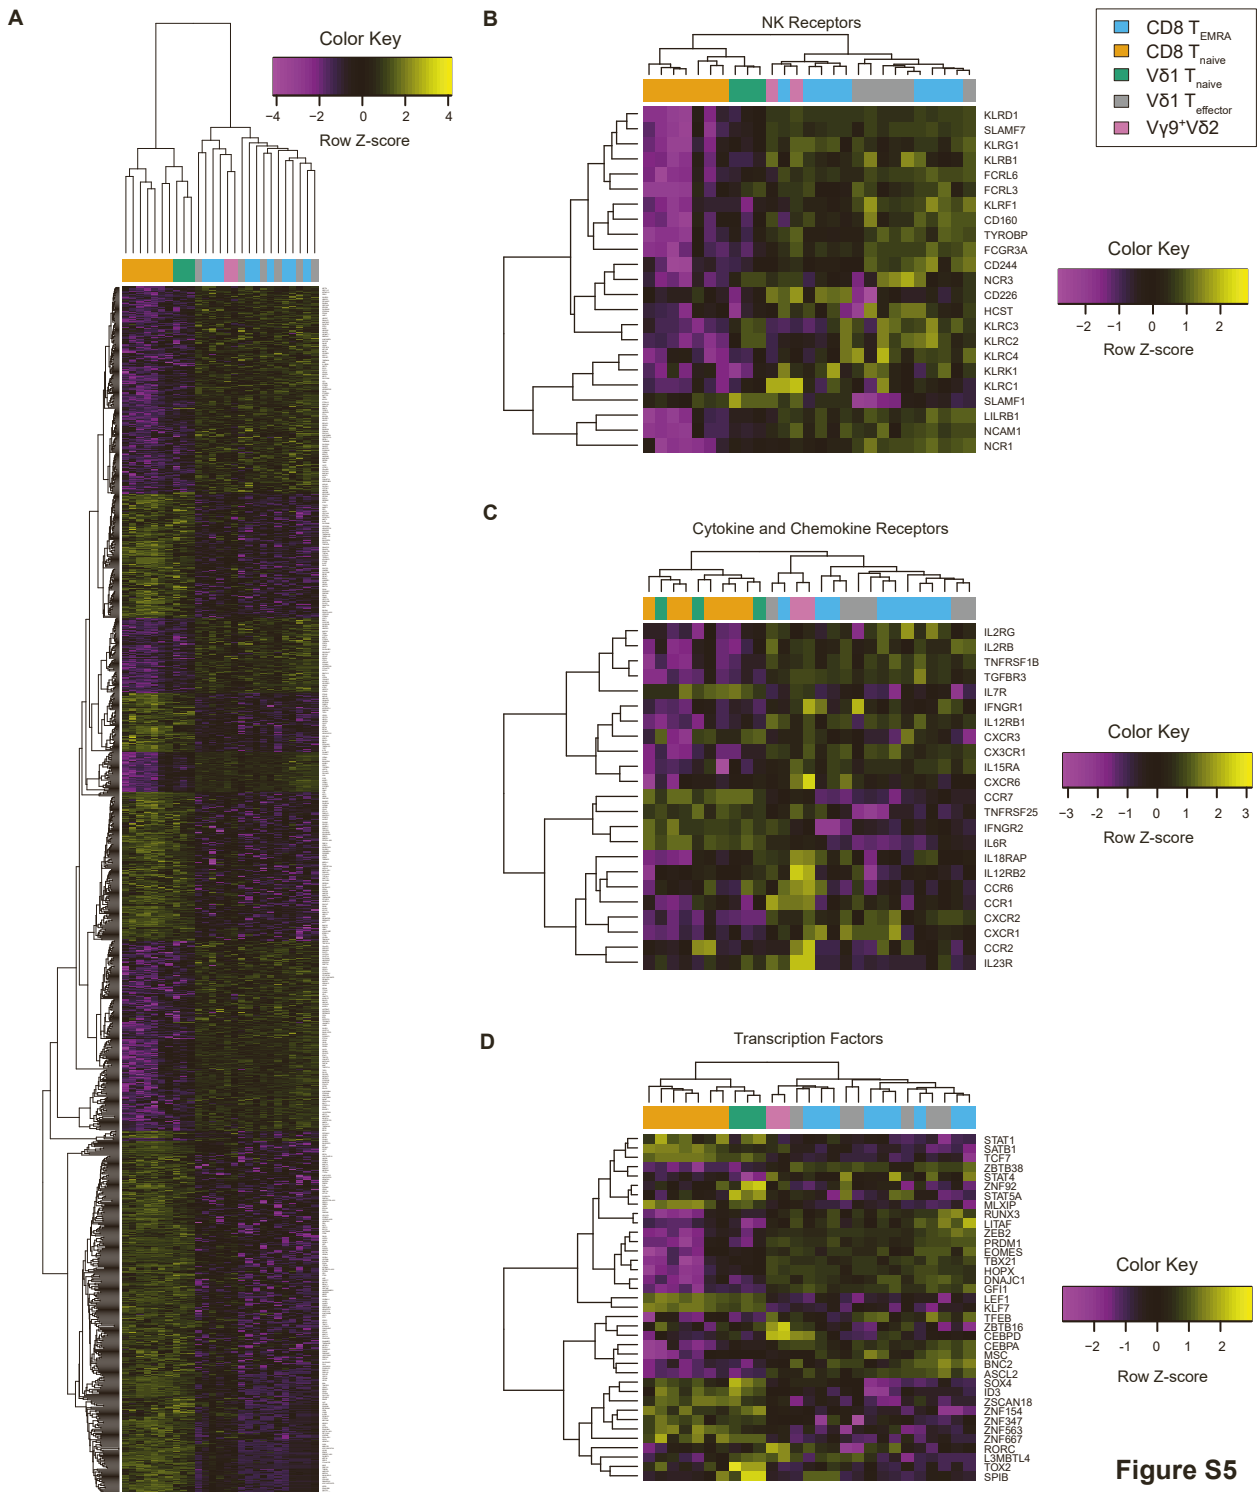

**Figure S5**

**Figure S5. Transcriptomic analysis of  $V\gamma 9^+V\delta 2^+$  cells reveals an effector-like program. Related to Figure 5.**

**(A)** Hierarchically clustered heatmap of the core 1150 transcripts differentially expressed in both  $V\delta 1$  and CD8 T-cell comparisons highlighted similarity between  $V\delta 1$   $T_{effector}$  cells, CD8  $T_{EMRA}$  cells, and  $V\gamma 9^+V\delta 2^+$  cells. Genes are plotted row-wise and scaled to represent Z-scores across samples.

**(B-C)** Heatmaps of bespoke gene lists linked to NK receptors, and cytokine and chemokine receptors were created, utilising hierarchical clustering algorithms.

**(D)** A heatmap of transcription factors expression in  $V\delta 1$ , CD8, and  $V\gamma 9^+V\delta 2^+$  T-cell populations was plotted utilising hierarchical clustering. This analysis includes a broader range of transcription factors than Figure S3F incorporating those differentially expressed between  $V\delta 1$  and CD8 T-cell populations, and those enriched in the  $V\gamma 9^+V\delta 2^+$  compartment (*RORC*, *PLZF*, *SATB1*, and *CEBPD*).

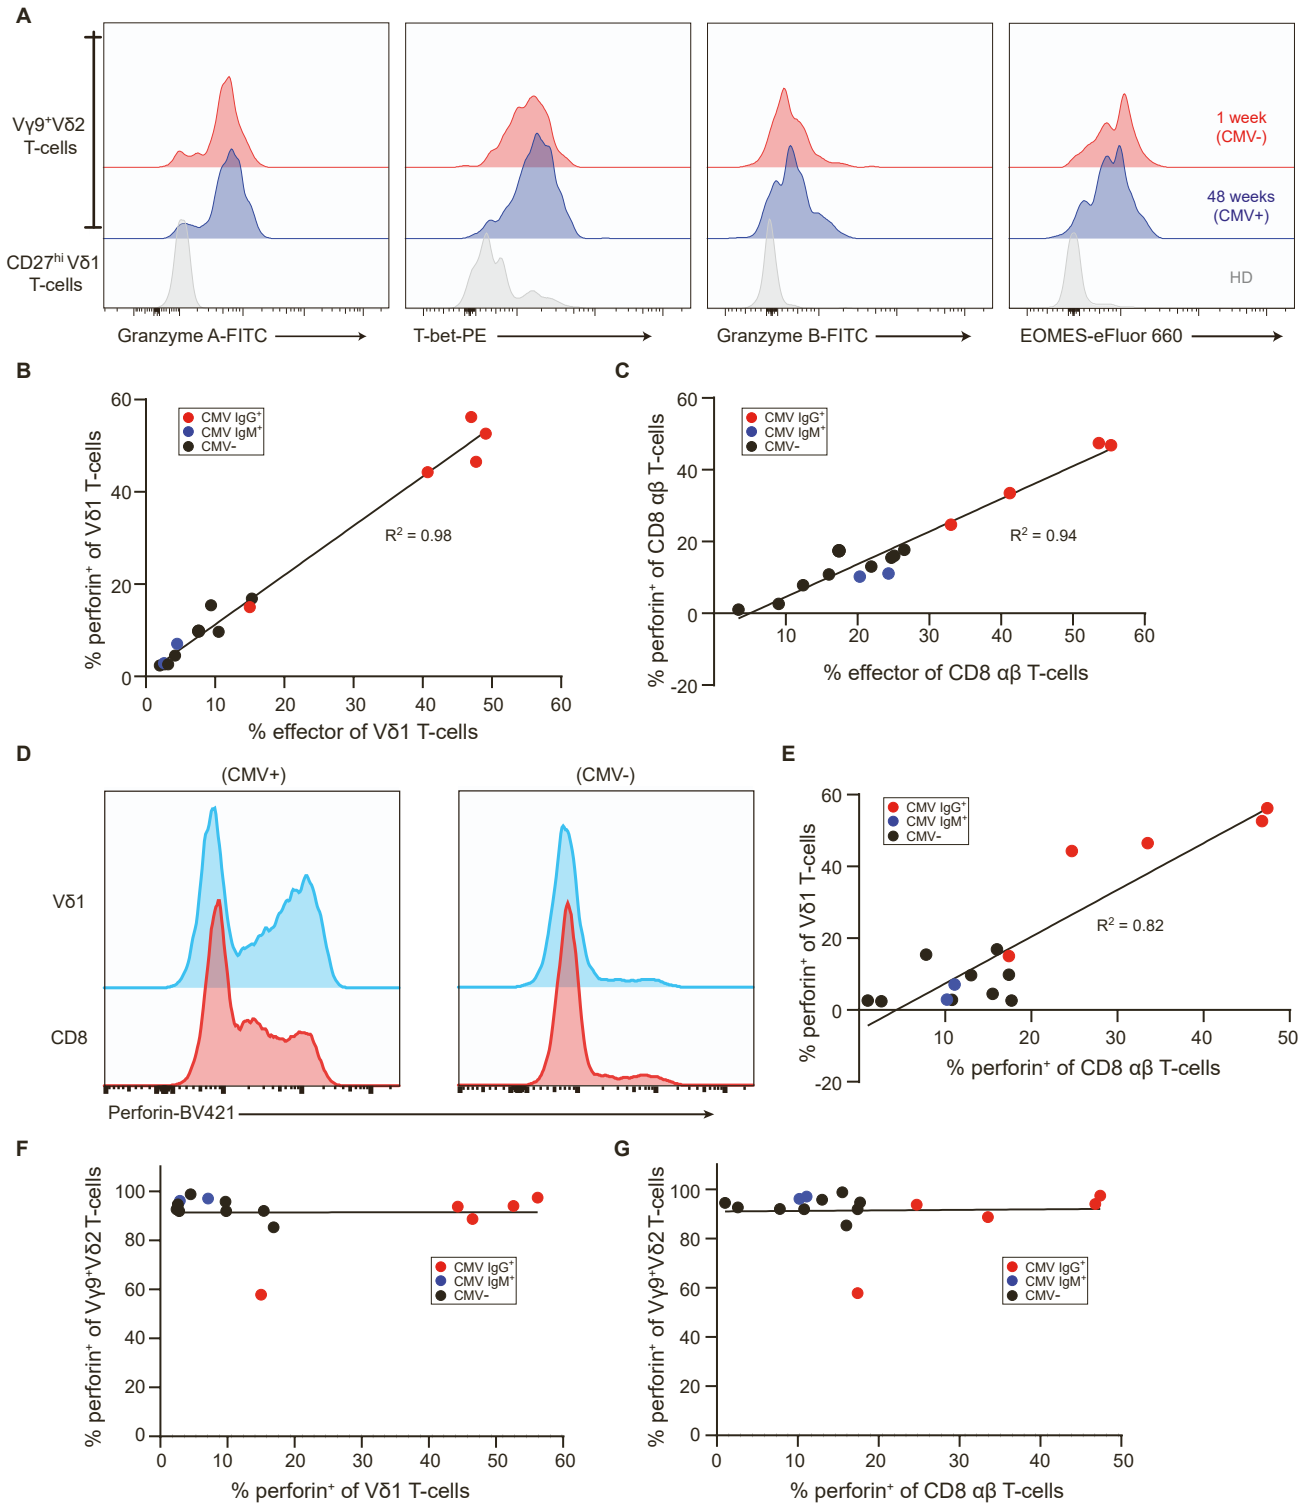

**Figure S6**

**Figure S6. Adaptive differentiation of human  $\gamma\delta$  T-cells *in vivo*. Related to Figure 6.**

(A)  $V\gamma 9^+V\delta 2^+$  T-cells remain positive for Granzyme A, T-bet, Granzyme B, and Eomes even after CMV seroconversion.

(B) Correlation of percentage perforin and  $CD27^{lo/neg}$  status in the  $V\delta 1$  compartment in healthy children ( $R^2 = 0.98$ , Spearman coefficient = 0.95).

(C) Correlation of percentage perforin and  $T_{effector}$  ( $T_{CM} + T_{EM} + T_{EMRA}$ ) status in the CD8 T-cell compartment in healthy children ( $R^2 = 0.94$ , Spearman coefficient = 0.88).

(D) Perforin staining in total  $V\delta 1^+$  T-cells versus total CD8 T-cells in a representative CMV<sup>+</sup> healthy donor (HV16, age 78 months), and a CMV<sup>neg</sup> healthy donor (HV18, age 15 months).

(E) Percentage of perforin<sup>+</sup> cells in total  $V\delta 1^+$  T-cells cells correlates with perforin staining in CD8 T-cells ( $R^2 = 0.82$ , Spearman coefficient = 0.74).

(F) Percentage of perforin<sup>+</sup> cells in total  $V\gamma 9^+V\delta 2^+$  cells does not correlate with perforin staining in  $V\delta 1^+$  T-cells.

(G) Percentage of perforin<sup>+</sup> cells in total  $V\gamma 9^+V\delta 2^+$  cells does not correlate with perforin staining in CD8<sup>+</sup> T-cells.
